RESEARCH ARTICLE

# Prevalence, Awareness, Treatment and Control of Hypertension in Indonesian Adults Aged $\geq 40$ Years: Findings from the Indonesia Family Life Survey (IFLS)

Mohammad Akhtar Hussain<sup>1\*</sup>, Abdullah Al Mamun<sup>1</sup>, Christopher Reid<sup>2</sup>, Rachel R. Huxley<sup>2</sup>

**1** Division of Epidemiology and Biostatistics, School of Public Health, The University of Queensland, Brisbane, Australia, **2** School of Public Health, Curtin University, Perth, Australia

\* [drakhtarhussain@gmail.com](mailto:drakhtarhussain@gmail.com)

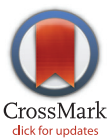

OPEN ACCESS

**Citation:** Hussain MA, Mamun AA, Reid C, Huxley RR (2016) Prevalence, Awareness, Treatment and Control of Hypertension in Indonesian Adults Aged  $\geq 40$  Years: Findings from the Indonesia Family Life Survey (IFLS). PLoS ONE 11(8): e0160922. doi:10.1371/journal.pone.0160922

**Editor:** Yan Li, Shanghai Institute of Hypertension, CHINA

**Received:** March 19, 2016

**Accepted:** July 27, 2016

**Published:** August 24, 2016

**Copyright:** © 2016 Hussain et al. This is an open access article distributed under the terms of the [Creative Commons Attribution License](https://creativecommons.org/licenses/by/4.0/), which permits unrestricted use, distribution, and reproduction in any medium, provided the original author and source are credited.

**Data Availability Statement:** We would like to draw your attention that the manuscript is based on a secondary data analysis of the Indonesia Family Life Survey (IFLS), which is publicly available for download after registration with the RAND corporation/IFLS website. As per their policy, the database is freely accessible only to those researchers who have registered their interest on the RAND website. We have already provided the link to download the data upon registration in our manuscript. The IFLS-4 data are open for public use

## Abstract

### Objective

Hypertension is the major driver of the cardiovascular epidemic facing Indonesia in the 21<sup>st</sup> century. Understanding the socioeconomic inequalities associated with hypertension is essential for designing effective intervention strategies. The aim of the current study was to use sub-nationally representative survey data to examine socio-demographic inequalities in the prevalence, diagnosis and management of hypertension in Indonesian adults.

### Methods

We investigated factors associated with hypertension prevalence, diagnosis, treatment and control using data on self-reported diagnosis and treatment, and blood pressure measurements, collected from 9755 respondents aged 40 years and up in the 2007 Indonesian Family Life Survey (IFLS 4).

### Results

Age-standardized prevalence of hypertension among the study participants was 47.8% (95% CI: 46.8, 48.9), of which almost 70% were undiagnosed. Hypertension was significantly higher in women than men (52.3% versus 43.1%,  $p$ -value $<0.001$ ). Prevalence of hypertension increased significantly with ageing ( $P_{for\ trend} < 0.001$ ). Over 91% (men: 92.1%, women: 90.0%) of hypertension cases were uncontrolled. Gender, education and socioeconomic status had differential impact on the diagnosis of hypertension and in receiving treatment.

### Conclusions

Overall, less than a third were aware of their hypertension and a quarter of those on medication had their blood pressure effectively controlled. Men and those of younger age were more vulnerable to have undiagnosed and untreated hypertension. Substantial effort should

after registration on RAND Corporation website (<http://www.rand.org/labor/FLS/IFLS/ifs4.html>).

**Funding:** The authors received no specific funding for this work.

**Competing Interests:** The authors have declared that no competing interests exist.

be given to improve awareness about the condition and making provision for early diagnosis and treatment.

## Introduction

Globally, elevated blood pressure is the leading risk factor in terms of its contribution to the burden of cardiovascular disease (CVD) [1,2] with two-thirds of all stroke and half of all coronary heart disease (CHD) attributable to sub-optimal blood pressure levels.[3] In 2000, approximately one billion people worldwide were estimated to be hypertensive, two-thirds of whom resided in lower- and middle-income countries (LMIC) and this figure is predicted to increase to 1.56 billion by 2025 with a disproportionate burden occurring in LMIC.[4]

Intervention studies have clearly demonstrated that blood pressure levels are amenable to intervention through behaviour and lifestyle modification either alone or in conjunction with antihypertensive medication.[1, 4–7] Indeed, a substantial component of the observed declines in CVD rates in high-income countries has been attributable to widespread use of antihypertensive therapy.[8] However, treatment of hypertension is predicated on an individual being aware of their hypertensive status which given the often asymptomatic nature of elevated blood pressure remains a major obstacle—particularly in LMIC, where routine CVD surveillance is limited and access to medical care remains prohibitively expensive for large parts of the population.[9–12] Even in high-income countries, awareness of hypertension remains a challenge with only 50% of the population aware of their hypertensive status decreasing to about 40% in LMIC.[13–16] And of those treated, the proportion of individuals who have their hypertension controlled remains low (25–40%). Moreover, significant socio-economic disparities in the level of awareness, treatment and control of hypertension exist particularly in LMIC.[12]

One of the most populous LMIC is Indonesia with a population of more than 250 million people. Similar to other LMIC the burden of CVD in Indonesia has increased significantly in recent decades: stroke, CHDs and hypertensive heart disease account for more than a third (0.5million) of all deaths in Indonesia with hypertension being one of the leading causes of mortality. [17,18] Although there is some evidence that the mean population level of blood pressure and the prevalence of hypertension has risen in Indonesian adults over past decades, little is known regarding its treatment and control within the population. [17, 19–23] Using national representative data from the fourth wave of the Indonesia Family Life Survey (IFLS-4) conducted in 2007/2008, [24] we report on the prevalence, awareness, treatment and control of hypertension in Indonesian men and women and examine how these patterns differ across social strata.

## Methods

### Study population

Data were sourced from the IFLS-4, a continuing health survey initiated in 1993 with three subsequent rounds of data collection (1997/1998; 2000; 2007/2008) with the fourth wave (IFLS-4) being completed in 2008. [24] The surveys collected information on individual, household and community level data using multistage stratified sampling. The original sampling frame was based on households from 13 out of 27 Indonesian provinces that were selected to maximize the representativeness of the study population and which represented approximately 83% of the Indonesian population in 1993. [25] The sampling and survey methods have been discussed in detail elsewhere. [25] The fourth wave of IFLS included 44,103 (51% women)

individuals of all ages—(<1 to 80+ years) from 13,535 households located in both urban and rural areas. [25]

### Ethics approval

This study is based on publicly available de-identified data. The use of the dataset for this study was approved by the School of Public Health Research Ethics Committee, School of Public Health, University of Queensland. The IFLS surveys and their procedures were reviewed and approved by the Institutional Review Boards (IRBs) in the United States (at RAND) and in Indonesia at the University of Gadjah Mada (UGM). Written informed consent was obtained from all respondents prior to data collection.

### Blood pressure and hypertension measurement

Blood pressure was measured thrice at home by specially trained nurses on individuals' age  $\geq 15$  years, using Omron digital self-inflating sphygmomanometers while participants were in a seated position. The first measurement was taken at the beginning of the interview with the subsequent two measures taken during the course of the interview. The average of the three measurements was used for current analysis. Information on awareness, treatment and control of hypertension was based on an interviewer administered questionnaire to all individuals  $\geq 40$  years, hence the current analysis is restricted to these individuals.

Individuals with hypertension were defined in one of three ways: i) mean systolic blood pressure (SBP)  $\geq 140$  mm Hg and/or mean diastolic blood pressure (DBP)  $\geq 90$  mm Hg; ii) a self-report diagnosis of hypertension; or iii) self-reported use of blood pressure lowering medication. [26] Respondents were additionally classified as i) pre-hypertensive (SBP 120–139 or DBP 80–89 mm Hg); ii) stage 1 hypertensive (SBP 140–159 mm Hg or DBP 90–99 mm Hg); or iii) stage 2 (SBP  $\geq 160$  mm Hg or DBP  $\geq 100$  mmHg) hypertensive. [26]

Awareness, treatment and control hypertension were defined using recognised criteria. [10] Awareness of hypertension was defined as self-report of any previous diagnosis of hypertension by a medical professional and was based on the respondents' response to the following question: *Has a doctor/paramedic/nurse/midwife ever told you that you had hypertension?* Those answering 'yes' were subsequently asked: *In order to manage your hypertension are you currently taking prescribed medication on a weekly basis?* Those answering yes to this question were considered to be on treatment. In those reporting to be on antihypertensive medication, control of hypertension was defined as having a mean SBP  $< 140$  and DBP  $< 90$  mmHg.

### Measurement of body size

Body mass index (BMI  $< 18.5$  kg/m<sup>2</sup>: underweight; 18.5–24.9 kg/m<sup>2</sup>: normal weight; 25.0–29.9 kg/m<sup>2</sup>: overweight and;  $\geq 30.0$  kg/m<sup>2</sup>: obese) was derived from height and weight measured during the physical examination. Height was measured with Shorr measuring boards and weight was measured using Seca floor-model scales developed in collaboration with UNICEF. The floor-model scales had a digital read-out and were accurate to the nearest 0.1 kg. Waist measurement was measured using a measuring tape and measurements were recorded to nearest 0.1 cm.

### Socio-demographic characteristics

Socio-demographic information was collected by questionnaire which included questions on area of residence (urban; rural); marital status (currently married or unmarried); highest level of attained education (grouped as illiterate; elementary school; high school (or equivalent)

completed; graduate and above); socio-economic development (household wealth index computed based on household assets), health insurance status (non-insured or insured), outpatient health care access (whether visited any outpatient health care clinic in one month prior to survey or not). Principal Component Analysis (PCA) was used to construct a wealth index. [27, 28] Household assets included in the matrix for PCA were house and land occupied by the household, other house/building, land (not used for house or farm), vehicles (cars, boats, bicycles, motorbikes), household appliances (radio, tape recorder, television, fridge, sewing or washing machine, VCD player, mobile phone and others), savings/certificate of deposits/stocks, jewellery and household furniture and utensils; and household characteristics- access to pipe water, both for drinking and other household needs, access to toilet, access to electricity and cooking with electric/gas stove. We assumed that the first principal component is a measure of economic status. [29] The PCA score or the wealth index was categorised into quintiles: Q1 (poorest quintile) to Q5 (least poor quintile). Sample weights were not used during the PCA operation, but rather when constructing population wealth quintiles. The lifestyle risk factors that were included were current smoking status and level of physical activity. Physical activity was assessed through a set of questions [modified short form of International Physical Activity Questionnaire (IPAQ)] on the types and times of physical activities engaged in, in all parts of life: work, home and exercise. [30] The total duration of activities were transformed to Metabolic Equivalent of Tasks (METs)-minutes and summed to gain an overall estimate of physical activity in a week [<http://www.ipaq.ki.se>] and further classified as low, moderate and high level of physical activity. [30]

## Statistical analysis

Only respondents with complete information on blood pressure measures and hypertension awareness were included in the analysis. Outcome variables were mean SBP and DBP, prevalence of categories of hypertension and awareness, treatment and control of hypertension. Prevalence of hypertension data were analysed, considering the survey design and standardized using the age and sex distribution of the Indonesia census population in 2010. [31] Logistic regression was used to test for trends across age groups, body mass index (BMI) categories, waist circumference categories, educational level and wealth index quintile with adjustment for age, BMI, education, wealth index, as appropriate, and lifestyle risk factors (smoking and physical activity level). The same procedure was used to estimate adjusted odds ratios (and 95% confidence intervals) for hypertension by level of attained education. Marginal statistics were computed to estimate the predicted probabilities of hypertension across sex and other sociodemographic variables.

Mean levels of SBP and DBP, adjusted for socio-demographic, smoking and physical activity level were estimated in each of the nine ordinal groups of body mass index and eight ordinal groups of waist circumference. Among those with hypertension, the percentages of hypertensive aware of their hypertension, treated, treated and controlled; and aware, but not treated, were estimated in each age group for both sexes as well as for other socio-demographic variables. These percentages (and SEs) were then age standardized with the total sample of hypertensives in this survey used as the standard population. Differences between the groups were tested using  $\chi^2$  test for proportion. Odds ratios for socio-demographic and lifestyle risk factors with uncontrolled hypertension (hypertensives with SB  $\geq 140$  mm Hg or DBP  $\geq 90$  mm Hg) by sex were calculated by multiple logistic regression analyses. Stepwise logistic regression analyses were used to evaluate the factors that were independently associated with uncontrolled hypertension in the whole population, and separately in women and men; P-values for covariates to be included in the model were set at 0.05. Likelihood Ratio tests rather than Wald tests were used for deciding which variables to include in the model. Forward and backward

stepwise logistic regression analysis produced similar results but only the latter are shown as the model had greater AIC and BIC values compared with the forward model. For all analyses we used inverse probability weights and complete cases were weighted by the inverse of their probability of being a complete case. [32,33] Data were analysed using Stata software version 12.0 for Windows (StataCorp LP, College Station, TX) and for all statistical tests a two-sided p-value < 0.05 was considered statistically significant.

## Results

### Participant characteristics

Overall, there were 11712 respondents ≥ 40 years in IFLS-4 (Fig 1). Of these 1677 (14.3%) did not have complete information and were excluded from further analysis, hence the following analysis is based on 9755 participants (85.4%; 53.5% women). Respondents with incomplete information had significantly higher measured SBP compared to those with complete information (152.1 mm Hg vs. 139.5 mm Hg; p<0.001). The median age of the participants was 52 (IQR: 45–62) years and other baseline characteristics are shown in Table 1.

### Mean SBP and age-standardized prevalence of hypertension

The overall mean SBP was significantly higher in women (141.0 mmHg; 95% CI, 140.3–141.7) than in men (137.7 mmHg; 95% CI, 137.0–138.2) and rose progressively with age in both sexes

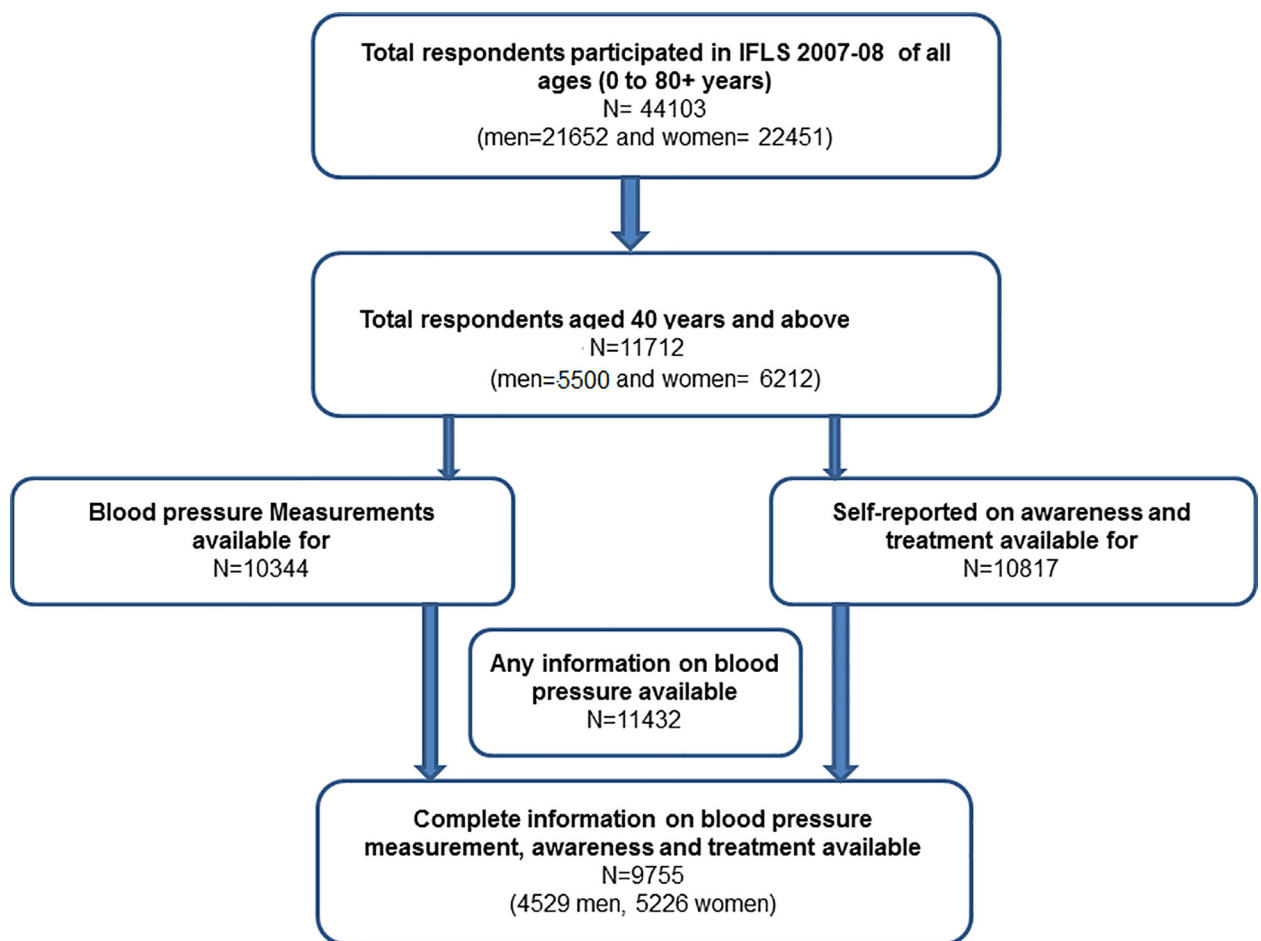

**Fig 1. Flowchart showing selection of study sample.**

doi:10.1371/journal.pone.0160922.g001

(S1 Fig). The age-standardized prevalence of hypertension was 47.8% (Table 2) with 37.4% of the population considered to be ‘pre-hypertensive’ (S1 Table). The prevalence of hypertension was significantly greater in women (52.3% vs. 43.1%;  $p < 0.001$ ) and in older compared with

**Table 1. Baseline characteristics of study population.**

| Total                                       | Men  |            | Women |            | All  |            |
|---------------------------------------------|------|------------|-------|------------|------|------------|
|                                             | n    | Weighted % | n     | Weighted % | n    | Weighted % |
| <b>Age group</b>                            |      |            |       |            |      |            |
| 40–49                                       | 4529 | 100        | 5226  | 100        | 9755 | 100        |
| 50–59                                       | 1903 | 39.2       | 2232  | 42.9       | 4135 | 41.1       |
| 60–69                                       | 1352 | 33.2       | 1493  | 29.4       | 2845 | 31.2       |
| ≥70                                         | 814  | 18.0       | 969   | 18.4       | 1783 | 18.2       |
|                                             | 460  | 9.3        | 532   | 9.1        | 992  | 9.2        |
| <b>Housing locality</b>                     |      |            |       |            |      |            |
| Urban                                       | 2221 | 42.4       | 2653  | 42.6       | 4874 | 42.5       |
| Rural                                       | 2308 | 57.5       | 2573  | 57.3       | 4881 | 57.4       |
| <b>Current Marital status</b>               |      |            |       |            |      |            |
| Married                                     | 4221 | 93.1       | 3575  | 69.2       | 7786 | 80.7       |
| Unmarried                                   | 318  | 6.8        | 1651  | 30.7       | 1969 | 19.2       |
| <b>Education</b>                            |      |            |       |            |      |            |
| Illiterate                                  | 475  | 11.2       | 1307  | 25.8       | 1782 | 18.7       |
| Elementary school                           | 2306 | 53.3       | 2634  | 51.8       | 4940 | 52.5       |
| High school                                 | 1322 | 27.1       | 1029  | 18.0       | 2351 | 22.4       |
| Graduate and above                          | 415  | 8.2        | 251   | 4.3        | 666  | 6.2        |
| <b>Wealth index</b>                         |      |            |       |            |      |            |
| Q1(poorest quintile)                        | 907  | 20.2       | 1180  | 23.9       | 2087 | 22.1       |
| Q2                                          | 908  | 21.3       | 1022  | 20.9       | 1930 | 21.1       |
| Q3                                          | 850  | 19.7       | 940   | 18.5       | 1790 | 19.1       |
| Q4                                          | 849  | 18.4       | 963   | 17.5       | 1812 | 17.9       |
| Q5(least poor quintile)                     | 1016 | 20.2       | 1120  | 18.9       | 2136 | 19.5       |
| <b>Health Insurance*</b>                    |      |            |       |            |      |            |
| Yes                                         | 1436 | 29.6       | 1429  | 26.3       | 2865 | 27.9       |
| No                                          | 3093 | 70.4       | 3797  | 73.7       | 6890 | 72.1       |
| <b>Health care utilization*</b>             |      |            |       |            |      |            |
| Yes                                         | 627  | 13.3       | 1045  | 19.6       | 1673 | 16.6       |
| No                                          | 3902 | 86.7       | 4180  | 80.4       | 8082 | 83.4       |
| <b>Body mass index, (kg/m<sup>2</sup>)*</b> |      |            |       |            |      |            |
| <18.5                                       | 638  | 15.0       | 641   | 13.0       | 1279 | 13.8       |
| 18.5–24.9                                   | 2866 | 65.9       | 2547  | 51.8       | 5413 | 58.8       |
| 25–29.9                                     | 745  | 15.8       | 1383  | 26.3       | 2128 | 21.2       |
| ≥30                                         | 143  | 3.1        | 469   | 8.8        | 612  | 6.0        |
| <b>Waist circumference, (cm)*</b>           |      |            |       |            |      |            |
| <85 for men (<80 for women)                 | 2967 | 70.5       | 2164  | 45.4       | 5131 | 57.5       |
| 85–94 for men (80–89 for women)             | 943  | 19.9       | 1554  | 30.5       | 2497 | 25.4       |
| ≥95 for men (≥90 for women)                 | 441  | 9.4        | 1264  | 24.1       | 1705 | 17.0       |
| <b>Currently smoking</b>                    |      |            |       |            |      |            |
| Yes                                         | 3038 | 68.6       | 182   | 3.4        | 3220 | 34.7       |
| No                                          | 1419 | 31.4       | 5004  | 96.6       | 6535 | 65.2       |
| <b>Physical activity level</b>              |      |            |       |            |      |            |
| Low                                         | 868  | 17.6       | 1221  | 22.2       | 2089 | 20.1       |
| Moderate                                    | 1280 | 27.6       | 1957  | 37.8       | 3237 | 32.9       |
| High                                        | 2381 | 54.6       | 2048  | 39.9       | 4429 | 47.0       |

doi:10.1371/journal.pone.0160922.t001

**Table 2. Prevalence of hypertension by age, sex and socio-economic development in Indonesian men and women, IFLS 2007.**

|                                 | n    | Men, %(SE)    |               |               |                |               | Women, %(SE)  |               |                |               |               | Overall population <sup>†a</sup> |
|---------------------------------|------|---------------|---------------|---------------|----------------|---------------|---------------|---------------|----------------|---------------|---------------|----------------------------------|
|                                 |      | 40–49 y       | 50–59 y       | 60–69 y       | ≥ 70 y         | Total*        | 40–49 y       | 50–59 y       | 60–69 y        | ≥ 70 y        | Total*        |                                  |
| <b>Place of residence</b>       |      |               |               |               |                |               |               |               |                |               |               |                                  |
| Urban                           | 4874 | 36.7<br>(1.6) | 48.2<br>(2.0) | 63.0<br>(2.6) | 66.4(3.6)      | 46.2<br>(1.1) | 41.4<br>(1.5) | 56.2<br>(1.8) | 68.4(2.3)      | 76.7<br>(2.8) | 53.3<br>(1.0) | 49.8(0.7)                        |
| Rural                           | 4881 | 29.6<br>(1.5) | 43.9<br>(2.0) | 50.9<br>(2.6) | 63.4(3.1)      | 41.0<br>(1.0) | 39.6<br>(1.5) | 51.3<br>(2.0) | 62.2(2.3)      | 76.0<br>(2.8) | 51.6<br>(1.0) | 46.4(0.7)                        |
| <b>Wealth index</b>             |      |               |               |               |                |               |               |               |                |               |               |                                  |
| Q1:poorest quintile             | 2087 | 27.9<br>(3.0) | 46.2<br>(4.4) | 47.9<br>(4.6) | 62.6(4.8)      | 39.7<br>(2.1) | 41.5<br>(3.2) | 52.6<br>(3.6) | 61.8(3.7)      | 75.4<br>(3.9) | 51.2<br>(1.9) | 46.4(1.4)                        |
| Q2                              | 1930 | 30.2<br>(2.6) | 42.8<br>(3.4) | 60.5<br>(4.1) | 61.8(5.0)      | 41.5<br>(1.7) | 38.9<br>(2.5) | 55.3<br>(3.1) | 66.6(3.5)      | 77.1<br>(4.0) | 52.5<br>(1.6) | 47.3(1.2)                        |
| Q3                              | 1790 | 32.2<br>(2.2) | 41.0<br>(2.8) | 56.5<br>(3.7) | 66.8(4.9)      | 41.7<br>(1.5) | 41.1<br>(2.1) | 49.0<br>(2.8) | 65.1(3.5)      | 77.0<br>(5.2) | 51.7<br>(1.4) | 46.6(1.0)                        |
| Q4                              | 1812 | 31.8<br>(2.5) | 50.8<br>(3.3) | 52.9<br>(4.5) | 66.7(6.2)      | 44.0<br>(1.7) | 43.2<br>(2.5) | 54.8<br>(3.1) | 66.5(4.1)      | 72.2<br>(5.1) | 53.7<br>(1.7) | 48.9(1.2)                        |
| Q5:least poor quintile          | 2136 | 39.1<br>(2.5) | 50.0<br>(2.9) | 59.5<br>(4.3) | 66.9(6.2)      | 48.1<br>(1.7) | 37.7<br>(2.2) | 57.4<br>(2.9) | 63.0(4.0)      | 81.8<br>(4.5) | 52.6<br>(1.5) | 50.1(1.1)                        |
| <b>Education</b>                |      |               |               |               |                |               |               |               |                |               |               |                                  |
| Illiterate                      | 1782 | 28.4<br>(4.7) | 42.2<br>(5.1) | 61.7<br>(5.0) | 59.9(4.4)      | 40.6<br>(2.8) | 38.5<br>(3.2) | 49.6<br>(3.1) | 62.9(2.6)      | 74.5<br>(2.7) | 49.9<br>(1.7) | 46.9(1.5)                        |
| Elementary school               | 4940 | 31.8<br>(1.6) | 44.3<br>(2.0) | 51.5<br>(2.5) | 67.7(3.2)      | 41.9<br>(1.0) | 43.5<br>(1.5) | 53.7<br>(1.8) | 67.1(2.5)      | 78.6<br>(3.3) | 54.3<br>(1.0) | 48.2(0.7)                        |
| High School                     | 2351 | 32.1<br>(1.9) | 48.3<br>(2.6) | 60.2<br>(3.9) | 64.9(6.5)      | 44.3<br>(1.4) | 35.7<br>(2.1) | 56.5<br>(3.2) | 62.8(4.4)      | 83.5<br>(6.7) | 51.6<br>(1.6) | 47.1(1.1)                        |
| Graduate and above              | 666  | 40.5<br>(3.5) | 52.1<br>(5.0) | 64.7<br>(6.9) | 51.8<br>(16.5) | 48.7<br>(2.8) | 35.6<br>(4.0) | 60.4<br>(6.1) | 54.0<br>(12.4) | 1.0           | 53.2<br>(3.2) | 49.4(2.4)                        |
| Overall population <sup>a</sup> | 9755 | 32.7<br>(1.1) | 45.8<br>(1.4) | 55.6<br>(1.9) | 64.4(2.4)      | 43.1<br>(0.7) | 40.4<br>(1.1) | 53.5<br>(1.4) | 64.5(1.6)      | 76.3<br>(2.0) | 52.3<br>(0.7) | 47.8(0.5)                        |

\* Prevalence standardized for age.

† Prevalence standardized for age and sex.

<sup>a</sup> Values for trend by men,  $P < 0.0001$ ; women,  $P < 0.0001$ ; social-economic development,  $P = 0.007$ ; and education,  $P = 0.001$ .

doi:10.1371/journal.pone.0160922.t002

younger individuals (36.8% in <50 years vs 70.5% in ≥ 70 years). The prevalence of measured hypertension was significantly higher in urban (49.8%) compared with rural (46.4%) areas. In men only, the prevalence of hypertension progressively rose across quintiles of wealth and levels of education (Table 2).

After adjusting for sociodemographic variables including current smoking and level of physical activity, the odds of hypertension did not vary significantly across level of education (Fig 2) or wealth index (Fig 3) in either men or women.

### Association between body size and blood pressure

Across a wide range of values there was a positive and continuous relationship between BMI and waist circumference with SBP and DBP in both sexes (Fig 4). In men, a one standard deviation increment in BMI and waist circumference was associated with 4.0 mmHg and 3.4 mmHg higher SBP, respectively. In women, the corresponding values were 2.4 mmHg and 2.2 mmHg, respectively. Overall, across BMI and waist circumference (measured on a continuous scale) the adjusted predicted probability of hypertension rose with higher levels of BMI (BMI > 30 kg/m<sup>2</sup>) and waist circumference in both men and women (S2 Fig). In men, the odds of being

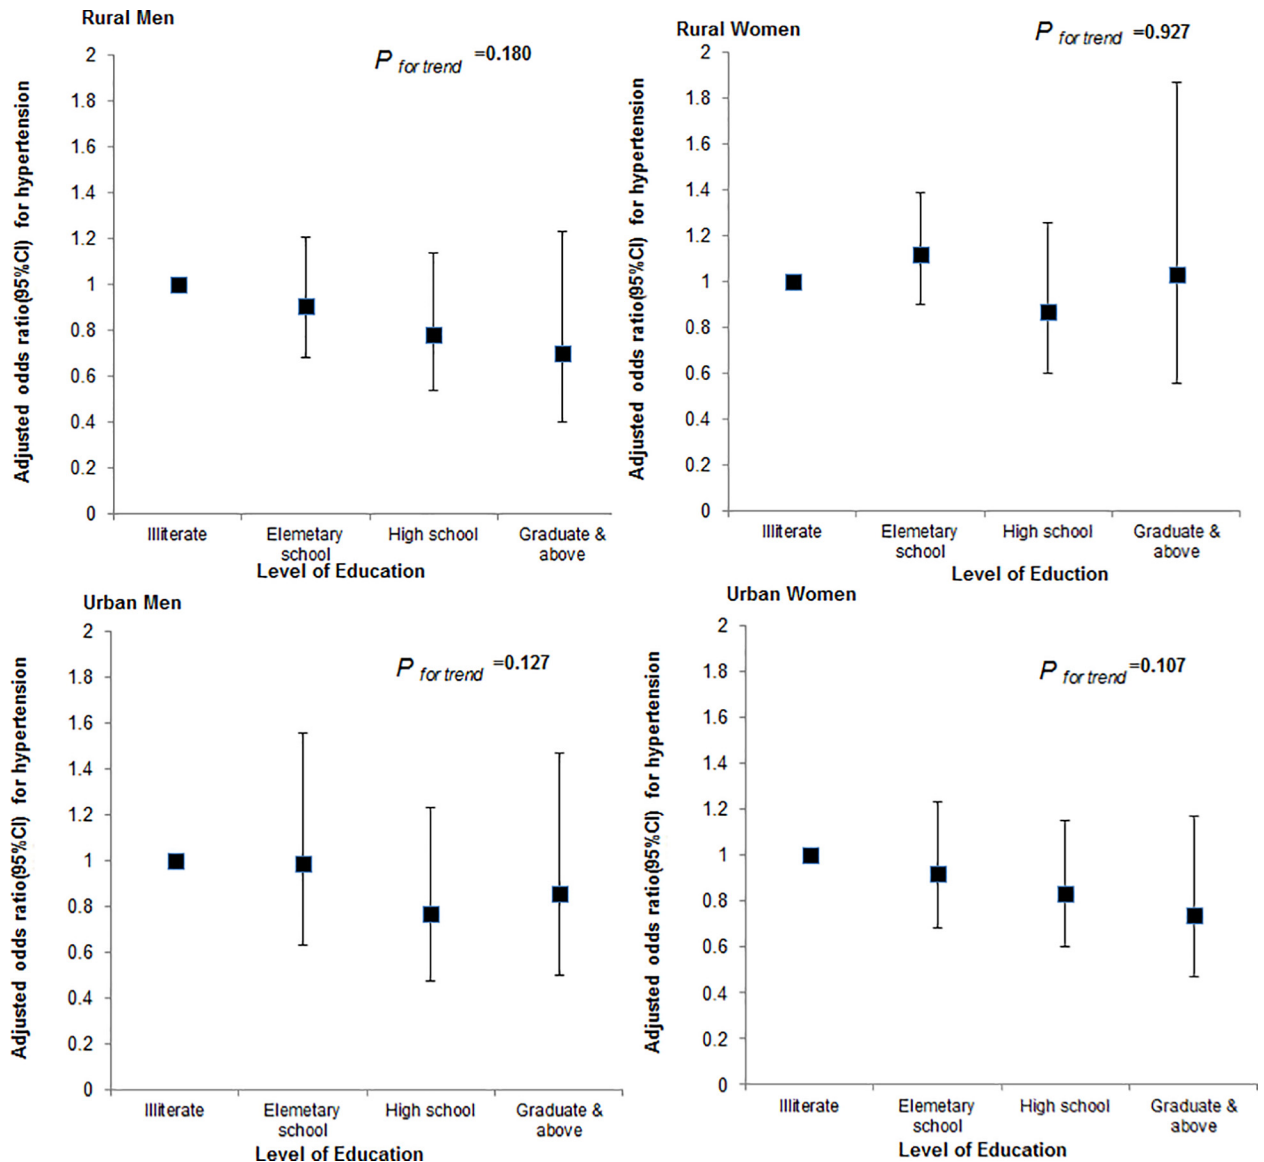

**Fig 2. Multiple adjusted odds ratio (AOR) for hypertension (showing 95% CIs) by education status in urban and rural areas in men and women.**

doi:10.1371/journal.pone.0160922.g002

hypertensive increased by 73% (95% CI: 60.3%–87.3%) per one standard deviation increment in BMI and by 70% (95% CI: 58.6%–83.5%) for WC; whereas the corresponding values for women were 55% (95% CI: 44.6%–66.3%) and 47% (95% CI: 37.9%–57.0%), respectively.

### Awareness, treatment and control of hypertension

Overall, nearly 37% of Indonesian adults with hypertension were aware of their condition. Significantly more women (43%) were aware of their hypertensive status compared to men (30%; Fig 5) with greater levels of awareness in urban compared with rural areas. Among all hypertensive individuals (irrespective of whether they were aware or not of their condition) about 25% were treated with prescribed antihypertensive medication (which is equivalent to approximately 70% of those who were aware of being hypertensive) with significantly more women



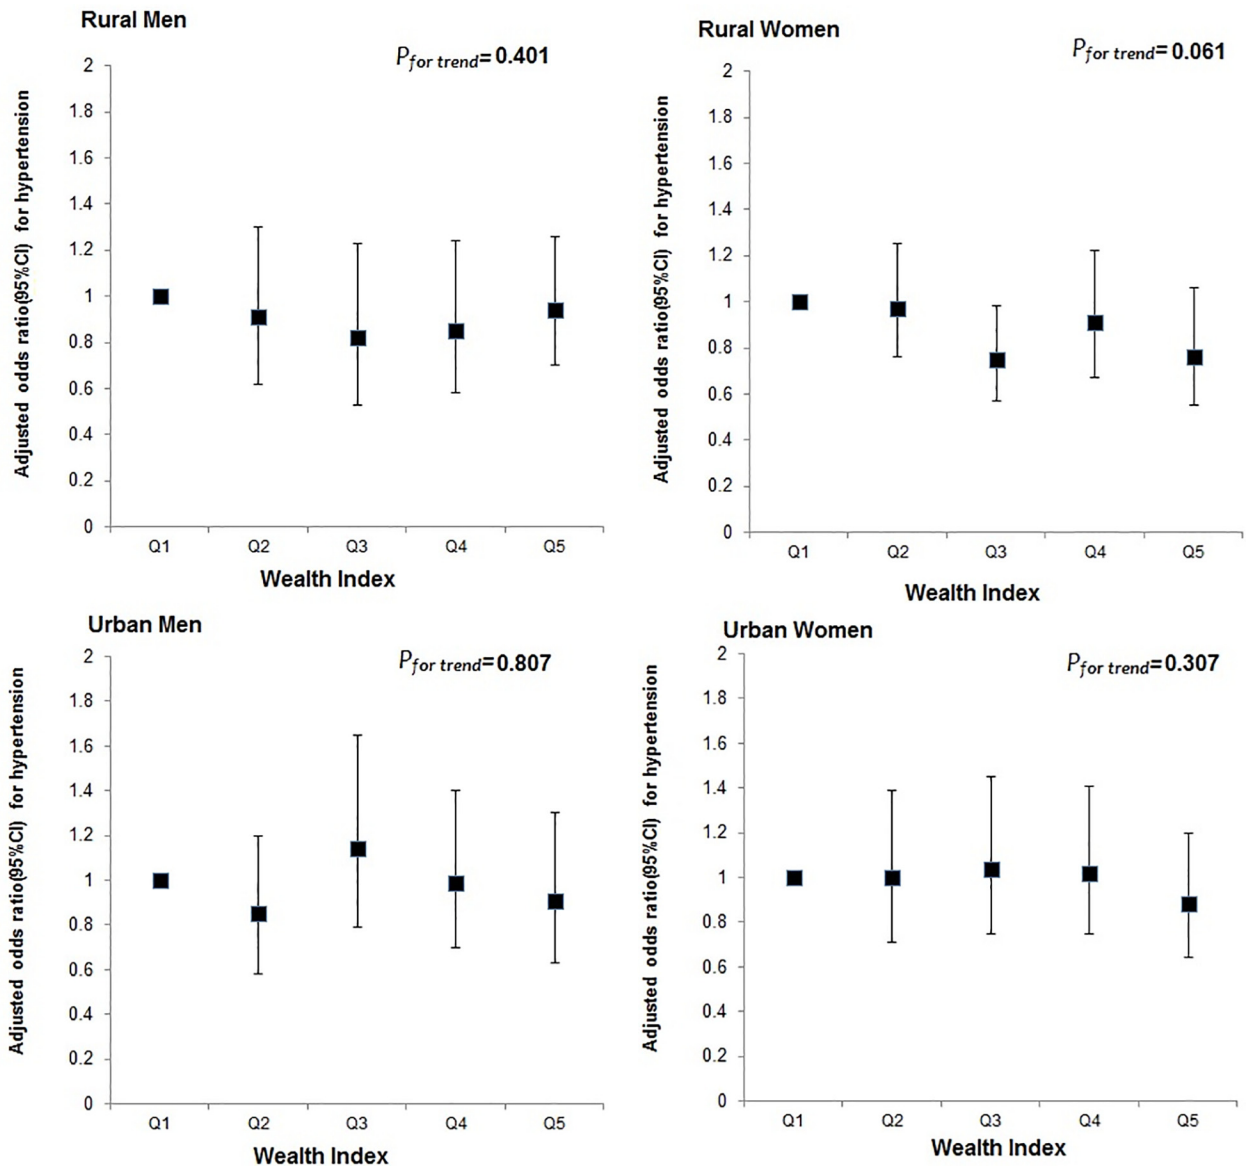

**Fig 3. Multiple adjusted odds ratio (AOR) for hypertension (showing 95% CIs) by wealth index in urban and rural areas in men and women.**

doi:10.1371/journal.pone.0160922.g003

than men being treated (Fig 5) irrespective of location. Among those treated, blood pressure control (140/90 mmHg) was achieved in 25% of individuals with slightly better control in men than in women (approximately 27% in men, 24.0% in women) with no significant differences by sex, education, area of residence and wealth index (S2 Table). Overall, adequate control of blood pressure was achieved in about 9% of all individuals with hypertension with similar estimates for rural (9.1%) and urban (9.0%) areas but with greater control occurring in women than in men irrespective of area (Fig 5).

Table 3 shows the results of stepwise logistic regression analysis of associated factors for uncontrolled hypertension in all the respondents, irrespective of sex, and separately for men and women. The factors significantly associated with increased risk of uncontrolled hypertension in overall sample were increasing age and higher waist circumference; whereas, female sex,

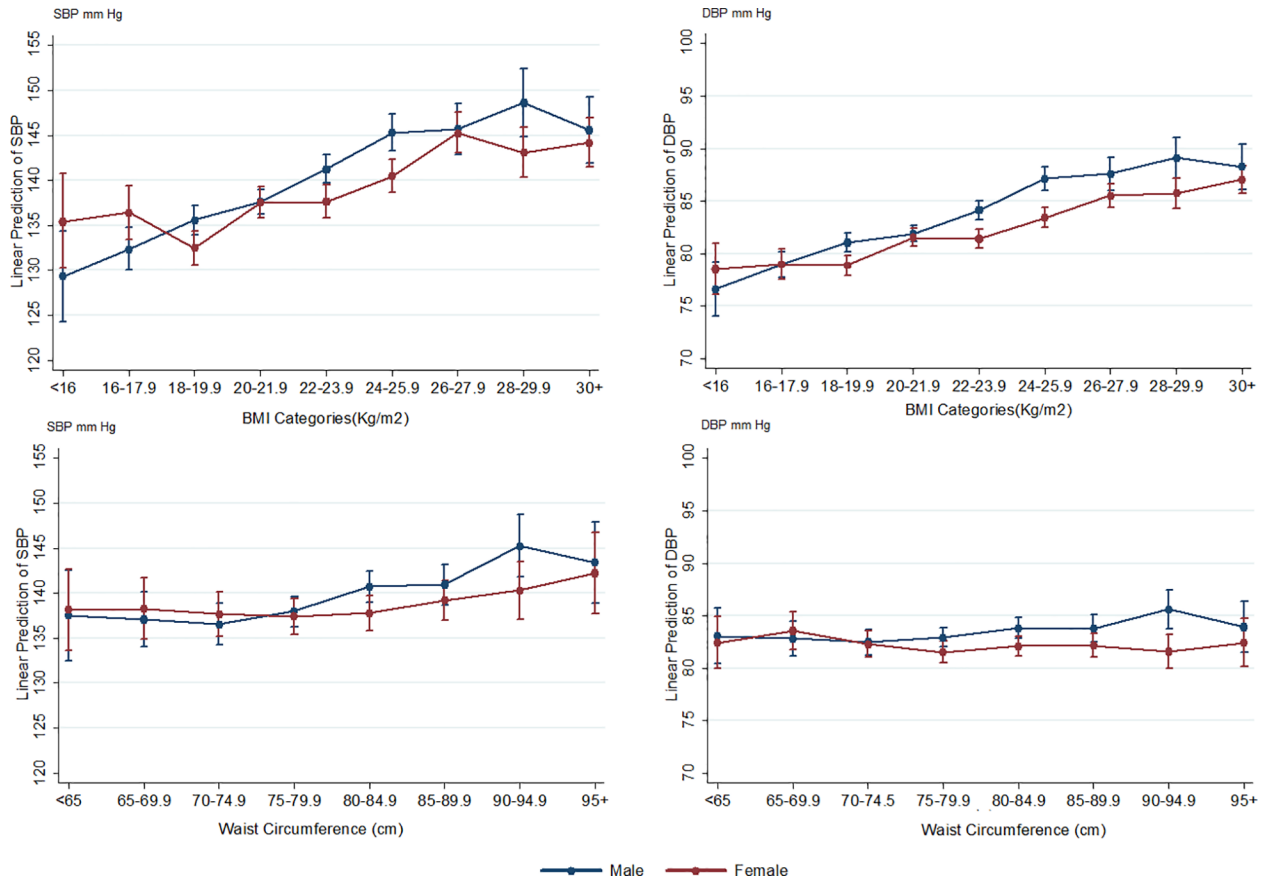

**Fig 4. Multiple adjusted mean systolic and diastolic blood pressure (showing 95% CI) across different categories of Body Mass Index and waist circumference in Indonesian men and women  $\geq 40$  years of age.**

doi:10.1371/journal.pone.0160922.g004

education, and health care utilisation were associated with significantly lower odds of uncontrolled hypertension. On gender-stratified analysis, elderly age groups were significantly associated with higher odds of uncontrolled hypertension in both women and men ( $P < 0.05$ ). Men and women participants availing health care services (in past one month before survey) had

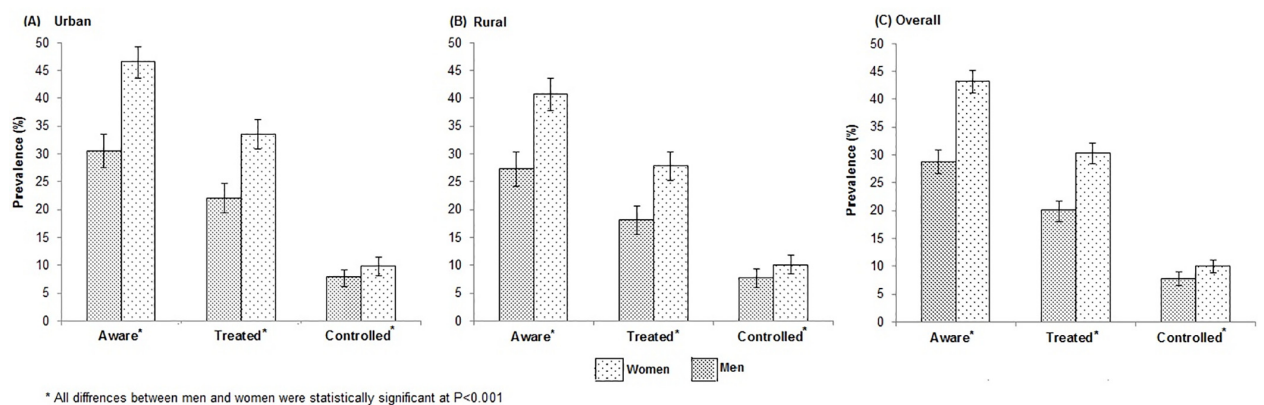

**Fig 5. Age-standardized awareness, treated and controlled hypertension prevalence levels (95% CI) in urban (A) and rural (B) areas of Indonesia and (C) overall in men and women with hypertension.**

doi:10.1371/journal.pone.0160922.g005

**Table 3. Stepwise logistic regression analysis of factors associated with uncontrolled hypertension.**

|                                                             | Adjusted OR (95% CI) |                  |                  |
|-------------------------------------------------------------|----------------------|------------------|------------------|
|                                                             | Overall population   | Men              | Women            |
| <b>Age groups</b> (ref:40–49 years)                         |                      |                  |                  |
| 60–69 years                                                 | 2.42(1.72, 3.41)     | 2.52(1.47, 4.29) | 2.05(1.35, 3.10) |
| 70+ years                                                   | 2.89(1.88, 4.45)     | 2.22(1.20, 4.11) | 3.14(1.83, 5.41) |
| <b>Women</b> (ref. Men)                                     | 0.71(0.56, 0.91)     | —                | —                |
| <b>Health care utilization</b> (ref. No)                    | 0.45(0.35, 0.57)     | 0.34(0.23, 0.52) | 0.53(0.39, 0.71) |
| <b>Body Mass Index</b> , kg/m <sup>2</sup> (ref:18–24.9)    |                      |                  |                  |
| 25–29.9                                                     | —                    | —                | 1.49(1.07, 2.08) |
| ≥30                                                         | —                    | —                | 1.8(1.16, 2.99)  |
| <b>Waist Circumference</b> (ref:<85 for men (<80 for women) |                      |                  |                  |
| 85–94 for men (80–89 for women)                             | 1.51(1.14, 2.01)     | —                | —                |
| ≥95 for men (≥90 for women)                                 | 1.54(1.15, 2.00)     | 2.00(1.09, 3.66) | —                |
| <b>Education</b> (ref: illiterate)                          |                      |                  |                  |
| Elementary school                                           | 0.64(0.45, 0.91)     | —                | 0.53(0.35, 0.80) |
| High school and above                                       | —                    | —                | 0.50(0.32, 0.80) |

doi:10.1371/journal.pone.0160922.t003

66% (AOR 0.34; 95% CI: 0.23–0.52) and 47% (AOR 0.53; 95% CI 0.53–0.72) less risk of having uncontrolled hypertension. Overweight and obesity were significantly associated with higher risk of uncontrolled hypertension only in women compared to higher waist circumference only in men. Additionally, education was only a significant factor in women ( $p < 0.05$ ) to be associated with lower odds of uncontrolled hypertension.

In terms of absolute numbers (as per 2010 census), these estimates would indicate that there are approximately 33 million adults (> 40 years) in Indonesia currently living with hypertension. But of these, only 12 million would be aware of their condition, of whom roughly 8.5 million would be on treatment, but only two million would have their hypertension adequately controlled.

## Discussion

Despite decades of awareness, hypertension remains one of the leading causes of the burden of disease in lower, middle and high-income countries. Findings from this nationally representative study of the Indonesian population illustrate why this remains so. Nearly one-half of all Indonesians aged over 40 years were hypertensive equating to roughly 33 million people—but only 2.5 million of them had their blood pressure adequately controlled with the vast majority of individuals with hypertension living at substantially increased risk of incurring a future vascular event.

Poor blood pressure control is only a part of the explanation for why so few adults with hypertension in Indonesia are effectively treated. In this study, only a third of individuals with hypertension were aware of their condition and although 70% were on treatment, effective blood pressure control was achieved in only a quarter of these individuals. Previously, poor access to medical facilities combined with limited availability of adequate treatments has been reported to be correlated with the level of hypertension in South-Asian populations. Interestingly, among those aware of their hypertension, the ratio of individuals who had their blood pressure controlled to those who were treated was 1:4.3 which is almost identical to that in the Chinese population [9] (1:4.2) whereas in the United States [12] the ratio is 2:3 indicating a much greater effectiveness in controlling blood pressure among those who are treated. Together, these data imply that in Indonesia (and other lower-middle income countries), the

most significant obstacles impeding adequate control of hypertension in the population are low awareness (and hence low rates of diagnosis) combined with limited access to effective treatment, and not necessarily treatment initiation among those already diagnosed. Hence, further research on improving blood pressure screening, access to effective medication and treatment adherence strategies in the Indonesian population are warranted.

The prevalence of hypertension reported in this study is notably higher than previous reports from earlier studies that ranged from 5–30%. [21, 24, 35–37] The lower prevalence of hypertension in these surveys could be due to the use of more liberal definitions of hypertension (SBP  $\geq 160$  mmHg and DBP  $\geq 95$  mmHg), [34] and variations in study design, population and methodology. [20, 23, 35] However, reassuringly, the prevalence of hypertension that we report is very similar to the age-specific prevalence reported in cross-sectional national health surveys [20, 36] and similar to that reported from other lower- and middle-income countries. [12]

There were some notable differences in the prevalence of hypertension by sex, age-group and across socioeconomic strata. In agreement with previous findings, the prevalence of hypertension was higher in women than in men [20, 37] but the prevalence of undiagnosed, untreated and uncontrolled hypertension was lower in women compared to men. Of particular concern is that the burden of hypertension was substantially greater in younger versus older individuals; approximately two-thirds of all individuals with hypertension were under 60 years of age. Moreover, the prevalence of undiagnosed and untreated hypertension was also higher in younger ( $< 60$  years) compared with older individuals. In contrast to higher-income countries where there is an inverse correlation between the prevalence of hypertension with socioeconomic group, in the current study, there was a positive correlation between increasing prevalence of hypertension and increasing affluence (only in men) and increasing level of education in agreement with findings from neighbouring, lower-middle income countries such as Thailand. [38] Compared with urban areas the age-standardized prevalence of hypertension in rural areas was slightly lower (39% versus 35%) whereas individuals living in urban areas were more likely to be treated than those in rural areas, most likely due to greater access to health care. However, once treated, there was no difference between urban and rural areas in the number of individuals who had their hypertension adequately controlled.

One of the factors that may be contributing to the high prevalence of hypertension in the Indonesian population is the increase in the prevalence of overweight and obesity that has occurred in the population possibly as a result of increasing economic development and 'Westernisation'. [39–41] Recent estimates suggest that one in five Indonesian adult men and one in three adult women are either overweight or obese. [42] In the current study, there was a strong continuous positive association between both BMI and waist circumference (as a marker of central obesity) with blood pressure, which is in agreement with previous reports. [37, 43] Other adverse lifestyle behaviours such as high dietary salt intake and low levels of physical activity which tend to occur with a country's increasing economic development are also associated with higher blood pressure levels at the population level. Thus, the implementation of effective health promotion campaigns that encourage the maintenance of a normal weight, healthy eating and regular physical activity are likely to have positive effects on mean blood pressure levels in the Indonesian population.

The current study provides important and robust information on levels of awareness, treatment and control of hypertension in the Indonesian population. The strengths of IFLS-4 survey include its high response rate, the representative nature of the study population, and the use of standardized methodology. There are however some important limitations; first, the self-reported information may have been subject to recall bias and may have varied by level of education and an individual's access to health care. Second, there was no information available for

the type of antihypertensive medication that may have been utilised by the study participants, or indeed on duration of usage and adherence to treatment—all of which will impact on blood pressure control. [26] Similarly, we do not have information on whether participants adopted better diet and lifestyle practices as a means of blood pressure control. Finally, we performed a complete case analysis which has the potential to introduce attrition bias as individuals with incomplete data had significantly higher blood pressure levels compared with those with complete data and thereby likely to underestimate the prevalence of hypertension. However, we used inverse probability weighted method to directly analyse only the complete cases with special weights assigned to those cases based on estimated probabilities of completeness, thereby minimising the possibility of attrition bias. [32, 33] Finally, the data on awareness, treatment and control of hypertension was restricted to those aged 40 and over, and therefore we are unable to comment on the burden of hypertension among younger individuals in whom hypertension has been reported to be on the increase. [36]

In summary, more than half of the adult Indonesian population aged over 40 years are hypertensive but only a tiny fraction have their blood pressure adequately controlled. If Indonesia is to achieve the global target of a 25% reduction in the burden of high blood pressure by 2025, [44] then multipronged clinical and public health strategies are urgently required that can i) increase awareness of hypertension in the population, ii) provide better access to more effective blood pressure lowering regimens to a greater proportion of the population and iii) promote population-wide reductions in adverse diet and lifestyle behaviours that are associated with obesity and higher blood pressure levels.

## Supporting Information

**S1 Fig. Mean level of systolic and diastolic blood pressure (mmHg) in Indonesian men and women.**

(TIF)

**S2 Fig. Marginal plot showing predicted probability of hypertension by body mass index and waist circumference in urban and rural areas, and in overall study population (adjusted for age, education, household wealth index, smoking and physical activity level).**

(TIF)

**S1 Table. Distribution of measured blood pressure in Indonesian adults  $\geq 40$  years of age according to various sociodemographic characteristics.**

(DOCX)

**S2 Table. Age-standardized percentages of hypertensive, aware, treated, controlled by various socio-demographic characteristics.**

(DOCX)

## Acknowledgments

The research was conducted based on IFLS-4 conducted by RAND (<http://www.rand.org/labor/FLS/IFLS.html>). We are thankful to RAND for providing the access to the survey data. We are grateful to the study participants who provided the survey data.

## Author Contributions

**Conceived and designed the experiments:** MAH AAM RRH.

**Analyzed the data:** MAH.

**Wrote the paper:** MAH AAM RRH CR.

Provided critical input in revising manuscript: AAM CR RRH.

## References

1. Global atlas on cardiovascular disease prevention and control. Geneva: World Health Organization; 2011. Available: [http://www.who.int/cardiovascular\\_diseases/publications/atlas\\_cvd/en/](http://www.who.int/cardiovascular_diseases/publications/atlas_cvd/en/). Accessed 12 December 2015.
2. Prospective Studies Collaboration. Age-specific relevance of usual blood pressure to vascular mortality: A meta-analysis of individual data for one million adults in 61 prospective studies. *Lancet*. 2002; 360:1903–1913. PMID: [12493255](#)
3. Perkovic V, Huxley R, Wu Y, Prabhakaran D, MacMahon S. The burden of blood pressure-related disease: A neglected priority for global health. *Hypertension*. 2007; 50:991–997. PMID: [17954719](#)
4. Kearney PM, Whelton M, Reynolds K, Muntner P, Whelton PK, He J. Global burden of hypertension: Analysis of worldwide data. *Lancet*. 2005; 365:217–223. PMID: [15652604](#)
5. Law MR, Morris JK, Wald NJ. Use of blood pressure lowering drugs in the prevention of cardiovascular disease: Meta-analysis of 147 randomised trials in the context of expectations from prospective epidemiological studies. *BMJ*. 2009; 338:b1665. doi: [10.1136/bmj.b1665](#) PMID: [19454737](#)
6. Lewington S, Clarke R, Qizilbash N, Peto R, Collins R, Prospective Studies Collaboration. Age-specific relevance of usual blood pressure to vascular mortality: A meta-analysis of individual data for one million adults in 61 prospective studies. *Lancet*. 2002; 360:1903–1913. PMID: [12493255](#)
7. Prevention of cardiovascular disease: Guidelines for assessment and management of total cardiovascular risk. World Health Organization; 2007. Available: [http://www.who.int/cardiovascular\\_diseases/guidelines/Full%20text.pdf](http://www.who.int/cardiovascular_diseases/guidelines/Full%20text.pdf). Accessed 12 December 2015.
8. Ezzati M, Obermeyer Z, Tzoulaki I, Mayosi BM, Elliott P, Leon DA. Contributions of risk factors and medical care to cardiovascular mortality trends. *Nat Rev Cardiol*. 2015; 12:508–530. doi: [10.1038/nrcardio.2015.82](#) PMID: [26076950](#)
9. Wu Y, Huxley R, Li L, Anna V, Xie G, Yao C, et al. Prevalence, awareness, treatment, and control of hypertension in china: Data from the china national nutrition and health survey 2002. *Circulation*. 2008; 118:2679–2686. doi: [10.1161/CIRCULATIONAHA.108.788166](#) PMID: [19106390](#)
10. Kearney PM, Whelton M, Reynolds K, Whelton PK, He J. Worldwide prevalence of hypertension: A systematic review. *J Hypertens*. 2004; 22(1):11–19. PMID: [15106785](#)
11. Pereira M, Lunet N, Azevedo A, Barros H. Differences in prevalence, awareness, treatment and control of hypertension between developing and developed countries. *J Hypertens*. 2009; 27(5):963–975. PMID: [19402221](#)
12. Chow CK, Teo KK, Rangarajan S, Islam S, Gupta R, Avezum A, et al. Prevalence, awareness, treatment, and control of hypertension in rural and urban communities in high-, middle-, and low-income countries. *JAMA*. 2013; 310(9):959–968. doi: [10.1001/jama.2013.184182](#) PMID: [24002282](#)
13. Agyemang C. Rural and urban differences in blood pressure and hypertension in ghana, west africa. *Public Health*. 2006; 120(6):525–533. PMID: [16684547](#)
14. Rao V, Daniel A. Application of the “rule of halves” for hypertension as an assessment tool in an urban slum at davangere. *Natl J Community Med*. 2014; 5(3):333–336.
15. Deepa R, Shanthirani CS, Pradeepa R, Mohan V. Is the 'rule of halves' in hypertension still valid?—evidence from the chennai urban population study. *J Assoc Physicians India*. 2003; 51:153–157. PMID: [12725257](#)
16. Mohan V, Deepa M, Farooq S, Datta M, Deepa R. Prevalence, awareness and control of hypertension in chennai—the chennai urban rural epidemiology study (cures-52). *J Assoc Physicians India*. 2007; 55:326–332. PMID: [17844691](#)
17. Noncommunicable diseases in the south-east asia region: Situation and response 2011. New Delhi: World Health Organization, Regional Office for South-East Asia.; 2011. Available: [http://www.searo.who.int/entity/noncommunicable\\_diseases/documents/9789290224136/en/](http://www.searo.who.int/entity/noncommunicable_diseases/documents/9789290224136/en/). Accessed 12 December 2015.
18. Country statistics and global health estimates by WHO and UN partners. Global health observatory data, indonesia country profile. 2015;2015. Available: [http://www.who.int/gho/countries/idn/country\\_profiles/en/](http://www.who.int/gho/countries/idn/country_profiles/en/). Accessed 13 December 2015.
19. Danaei G, Finucane MM, Lin JK, Singh GM, Paciorek CJ, Cowan MJ, Farzadfar F, Stevens GA, Lim SS, Riley LM, Ezzati M. National, regional, and global trends in systolic blood pressure since 1980: Systematic analysis of health examination surveys and epidemiological studies with 786 country-years and

- 5.4 million participants. *Lancet*. 2011; 377:568–577. doi: [10.1016/S0140-6736\(10\)62036-3](https://doi.org/10.1016/S0140-6736(10)62036-3) PMID: [21295844](https://pubmed.ncbi.nlm.nih.gov/21295844/)
20. Soemantri S, Pradono J, Hapsari D. Surkesnas 2001. National household health survey morbidity study-ncd risk factors in indonesia. 2001 Available: [http://www.who.int/chp/steps/STEPS\\_Report\\_Indonesia\\_National\\_2001.pdf](http://www.who.int/chp/steps/STEPS_Report_Indonesia_National_2001.pdf). Accessed 25 December 2015.
  21. Dans A, Ng N, Varghese C, Tai ES, Firestone R, Bonita R. The rise of chronic non-communicable diseases in southeast asia: Time for action. *Lancet*. 2011; 377:680–689. doi: [10.1016/S0140-6736\(10\)61506-1](https://doi.org/10.1016/S0140-6736(10)61506-1) PMID: [21269677](https://pubmed.ncbi.nlm.nih.gov/21269677/)
  22. Rahajeng E, Tuminah S. Prevalence of hypertension and its determinants in indonesia. *Journal of the Indonesian Medical Association*. 2009; 59: 580–587.
  23. Ng N, Stenlund H, Bonita R, Hakimi M, Wall S, Weinehall L. Preventable risk factors for noncommunicable diseases in rural indonesia: Prevalence study using WHO STEPS approach. *Bull World Health Organ*. 2006; 84(4):305–313. PMID: [16628304](https://pubmed.ncbi.nlm.nih.gov/16628304/)
  24. RAND. Indonesian Family Life Survey (IFLS). Available: <http://www.rand.org/labor/FLS/IFLS.html>. Accessed 10 December 2015.
  25. Strauss J, Witoelar F, Sikoki B, Wattie AM. The fourth wave of Indonesian Family Life Survey (IFLS4): Overview and field report. April 2009.
  26. Chobanian AV, Bakris GL, Black HR, Cushman WC, Green LA, Izzo JL, et al. The seventh report of the joint national committee on prevention, detection, evaluation, and treatment of high blood pressure: The JNC 7 report. *JAMA*. 2003; 289:2560–2572. PMID: [12748199](https://pubmed.ncbi.nlm.nih.gov/12748199/)
  27. Vyas S, Kumaranayake L. Constructing socio-economic status indices: How to use principal components analysis. *Health Policy Plan*. 2006; 21(6):459–468. PMID: [17030551](https://pubmed.ncbi.nlm.nih.gov/17030551/)
  28. Rutstein SO, Johnson K. The DHS wealth index. DHS comparative reports no. 6. 2004.
  29. Houweling TAJ, Kunst AE, Mackenbach JP. Measuring health inequality among children in developing countries: Does the choice of the indicator of economic status matter? *International Journal for Equity in Health*. 2003; 2:1–12.
  30. Guidelines for the data processing and analysis of the International Physical Activity Questionnaire. Available: [www.ipaq.ki.se](http://www.ipaq.ki.se). Accessed 10 December 2015.
  31. Statistics Indonesia, 2010 Population Census Data Secondary Statistics Indonesia, 2010 Population Census Data. Available: <http://sp2010.bps.go.id/index.php/navigation/topik>. Accessed 20 April 2015.
  32. Greenland S, Rothman KJ. Fundamentals of epidemiologic data analysis. In: Rothman KJ, Greenland S, Lash TL, eds. *Modern epidemiology*. Philadelphia, PA, USA: Lippincott Williams & Wilkins; 2008. pp219.
  33. Seaman SR, White IR. Review of inverse probability weighting for dealing with missing data. *Stat Methods Med Res*. 2013; 22(3):278–295. doi: [10.1177/0962280210395740](https://doi.org/10.1177/0962280210395740) PMID: [21220355](https://pubmed.ncbi.nlm.nih.gov/21220355/)
  34. Boedhi-Darmojo R. The pattern of cardiovascular disease in indonesia. *World Health Stat Q*. 1993; 46:119–124. PMID: [8303906](https://pubmed.ncbi.nlm.nih.gov/8303906/)
  35. Van Minh H, Soonthornthada K, Ng N, Juvekar S, Razzaque A, Ashraf A, Ahmed SM, Bich TH, Kanungsukkasem U. Blood pressure in adult rural INDEPTH population in Asia. *Global health action*. 2009; Supplement 1: doi: [10.3402/gha.v2i0.2010](https://doi.org/10.3402/gha.v2i0.2010)
  36. Susilowati D, Aryastami NK, Erry E. Hypertensi dan faktor-faktor risikonya di Indoensia. *Bulletin of Health System Research*. 2010; 13 (2):123–131.
  37. Tesfaye F, Nawi NG, Van Minh H, Byass P, Berhane Y, Bonita R, Wall S. Association between body mass index and blood pressure across three populations in Africa and Asia. *J Hum Hypertens*. 2007; 21(1): 28–37. PMID: [17066088](https://pubmed.ncbi.nlm.nih.gov/17066088/)
  38. Thawornchaisit P, de Looze F, Reid CM, Seubsman SA, Sleight AC, Thai Cohort Study T. Health risk factors and the incidence of hypertension: 4-year prospective findings from a national cohort of 60 569 thai open university students. *BMJ Open*. 2013; 3(6). pii: e002826. doi: [10.1136/bmjopen-2013-002826](https://doi.org/10.1136/bmjopen-2013-002826)
  39. Roemling C, Qaim M. Obesity trends and determinants in indonesia. *Appetite*. 2012; 58:1005–1013. doi: [10.1016/j.appet.2012.02.053](https://doi.org/10.1016/j.appet.2012.02.053) PMID: [22402303](https://pubmed.ncbi.nlm.nih.gov/22402303/)
  40. Umberger WJ, He X, Minot N, Toiba H. Examining the relationship between the use of supermarkets and over-nutrition in indonesia. *Am. J. Agr. Econ*. 2015; 97:510–525.
  41. Sairin S. Modernization and westernization: A never-ending discourse in indonesia. *Journal of Governance & Development*. 2011; 7:1–7.
  42. Badan Penelitian Dan Pengembangan Kesehatan. Kementerian Kesehatan. Republik Indonesia. Riset kesehatan dasar (riskesdas) 2013, laporan nasional 2013.

43. Benetou V, Bamia C, Trichopoulos D, Moutokalakias T, Psaltopoulou T, Trichopoulou A. The association of body mass index and waist circumference with blood pressure depends on age and gender: A study of 10,928 non-smoking adults in the Greek EPIC cohort. *Eur J Epidemiol*. 2004; 19(8):803–809. PMID: [15469038](https://pubmed.ncbi.nlm.nih.gov/15469038/)
44. World Health Organization. Global action plan for the prevention and control of noncommunicable diseases 2013–2020. 2013. Available: [http://apps.who.int/iris/bitstream/10665/94384/1/9789241506236\\_eng.pdf?ua=1](http://apps.who.int/iris/bitstream/10665/94384/1/9789241506236_eng.pdf?ua=1). Accessed 10 December 2015.
